# Supplementary material for: Do the Leaves of Multiple Invasive Plants Decompose More Easily than a Native Plant’s under Nitrogen Deposition with Different Forms?
Source: MDPI journal article supplement (doi:10.3390/nitrogen5010014), 2024-03-04
Supplement: s1 [file s1]

**Electronic supplementary materials:**

**Table S1** Differences in the number of functional gene pathways of soil bacterial communities involved in the decomposition process under nitrogen with four forms. Data (means and SE;  $n = 18$ ) with different letters in a transverse column indicate statistically significant differences ( $P < 0.05$ ).

The number of functional gene pathways of soil bacterial communities of most samples that lower than one was not shown in this table.

Abbreviations: CK, control; MixN, the mixed nitrogen forms.

|                                                                             | CK              | Nitrate          | Ammonium        | Urea            | MixN            |
|-----------------------------------------------------------------------------|-----------------|------------------|-----------------|-----------------|-----------------|
| 4-hydroxyphenylacetate degradation                                          | 1261.3±317.19b  | 1614.11±110.23ab | 1752.99±122.94a | 1896.95±118.86a | 1872.02±158.81a |
| Superpathway of L-arginine, putrescine,<br>and 4-aminobutanoate degradation | 14.46±7.20b     | 11.44±1.64b      | 21.74±1.76ab    | 42.84±14.96a    | 18.08±4.42ab    |
| L-arginine degradation II (AST pathway)                                     | 2044.42±417.01b | 3061.43±323.89a  | 3147.51±221.32a | 3554.06±223.35a | 3165.28±329.49a |
| Anaerobic aromatic compound degradation<br>(Thauera aromatica)              | 0.00±0.00ns     | 0.63±0.29ns      | 2.60±1.29ns     | 1.67±0.63ns     | 0.98±0.61ns     |
| Catechol degradation to $\beta$ -ketoadipate                                | 1388.92±318.8b  | 2020.09±116.23a  | 1942.06±116.73a | 2018.77±102.81a | 2009.08±114.97a |

|                                                       |                   |                   |                  |                  |                  |
|-------------------------------------------------------|-------------------|-------------------|------------------|------------------|------------------|
| Benzoyl-coa degradation II (anaerobic)                | 4.83±0.41b        | 12.8±2.58a        | 11.33±1.85a      | 12.87±1.80a      | 10.68±1.29ab     |
| Creatinine degradation I                              | 2434.14±574.62ns  | 3201.86±283.56ns  | 3209.58±306.02ns | 3750.7±459.23ns  | 3614.79±399.42ns |
| Glucose degradation (oxidative)                       | 73.98±20.17b      | 352.36±22.10a     | 302.61±47.02ab   | 443.97±125.22a   | 373.44±92.06a    |
| Superpathway of fucose and rhamnose degradation       | 241.58±51.26ns    | 230.19±23.08ns    | 305.15±36.96ns   | 592.62±229.43ns  | 318.98±63.62ns   |
| Fucose degradation                                    | 429.63±99.15b     | 1020.43±83.81a    | 1093.46±120.43a  | 1337.97±202.63a  | 1127.91±161.43a  |
| Superpathway of hexuronide and hexuronate degradation | 5647.49±1341.55b  | 7058.14±453.34ab  | 7425.53±285.72a  | 8516.32±355.85a  | 7580.72±356.69a  |
| D-galactarate degradation I                           | 1370.9±291.71b    | 1886.36±98.20a    | 2040.68±120.87a  | 2228.95±180.27a  | 2107.79±147.50a  |
| D-galacturonate degradation I                         | 11591.56±2722.75b | 13994.59±777.72ab | 14979.24±343.42a | 16477.43±765.26a | 14763.74±614.30a |
| Gallate degradation II                                | 863.06±211.03b    | 1180.68±71.39a    | 1115±55.49ab     | 1186.57±51.47a   | 1217.74±110.02a  |
| Gallate degradation I                                 | 612.01±143.19ns   | 837.89±78.80ns    | 783.85±74.60ns   | 836.09±60.87ns   | 837.97±98.88ns   |

|                                                                                              |                   |                   |                    |                   |                   |
|----------------------------------------------------------------------------------------------|-------------------|-------------------|--------------------|-------------------|-------------------|
| Superpathway of N-acetylglucosamine, N-acetylmannosamine and N-acetylneuraminate degradation | 3397.26±775.26b   | 4119.57±280.05ab  | 4488.5±400.18ab    | 5688.02±787.72a   | 4602.94±316.46ab  |
| D-glucarate degradation I                                                                    | 1160.22±256.76b   | 1732.93±94.62a    | 1908.71±113.58a    | 2187.86±182.10a   | 2040.62±180.33a   |
| Superpathway of D-glucarate and D-galactarate degradation                                    | 1370.9±291.71b    | 1886.36±98.20a    | 2040.68±120.87a    | 2228.95±180.27a   | 2107.79±147.50a   |
| Glucose and glucose-1-phosphate degradation                                                  | 8759.32±1553.48ns | 9995.21±408.44ns  | 11190.33±1107.21ns | 11007.65±704.03ns | 10058.69±389.95ns |
| Superpathway of β-D-glucuronide and D-glucuronate degradation                                | 5144.32±1245.86b  | 6791.96±420.47a   | 7033.35±336.97a    | 8119.94±291.07a   | 7282.26±407.29a   |
| Glycogen degradation I (bacterial)                                                           | 26283.83±6090.88b | 31412.43±1387.3ab | 33839.11±1159.87a  | 36476.41±1680.13a | 33088.96±784.14a  |
| Superpathway of glycol metabolism and degradation                                            | 86±12.73ns        | 79.01±10.03ns     | 110.67±15.62ns     | 239.24±91.62ns    | 116.51±26.76ns    |

|                                                                                        |                    |                    |                    |                    |                   |
|----------------------------------------------------------------------------------------|--------------------|--------------------|--------------------|--------------------|-------------------|
| Superpathway of glycerol degradation to 1,3-propanediol                                | 691.09±203.34ns    | 580.14±43.06ns     | 614.25±88.96ns     | 799.06±83.70ns     | 750.77±59.18ns    |
| 3-phenylpropanoate and 3-(3-hydroxyphenyl)propanoate degradation to 2-oxopent-4-enoate | 203.61±46.15b      | 624.05±134.18ab    | 605.32±126.32ab    | 756.36±166.71a     | 700.00±131.52a    |
| Superpathway of hexitol degradation (bacteria)                                         | 3583.11±1119.62ns  | 2797.73±150.02ns   | 3170.01±122.09ns   | 4143.47±825.55ns   | 3404.56±311.80ns  |
| L-histidine degradation I                                                              | 23584.65±5941.57ns | 26321.15±1638.74ns | 28274.87±1021.61ns | 28918.69±1320.77ns | 27988.83±859.18ns |
| Lactose and galactose degradation I                                                    | 73.86±16.93ns      | 88.32±17.01ns      | 105.96±17.95ns     | 481.96±269.38ns    | 146±60.85ns       |
| L-leucine degradation I                                                                | 24503.76±6459.59ns | 28814.02±2698.35ns | 28949.62±1126.15ns | 29165.63±1175.55ns | 28268.34±986.98ns |
| Superpathway of methylglyoxal degradation                                              | 40.43±11.07b       | 82.23±9.40ab       | 115.64±20.48ab     | 178.74±49.27a      | 121.87±21.75ab    |
| Methylgallate degradation                                                              | 1067.92±260.61b    | 1457±86.19a        | 1379.62±67.65ab    | 1468.78±62.64a     | 1506.28±134.84a   |

|                                                        |                    |                    |                    |                    |                   |
|--------------------------------------------------------|--------------------|--------------------|--------------------|--------------------|-------------------|
| Superpathway of L-arginine and L-ornithine degradation | 14.46±7.20b        | 11.44±1.64b        | 21.74±1.76ab       | 42.84±14.96a       | 18.08±4.42ab      |
| Superpathway of ornithine degradation                  | 1143.68±381.70ns   | 1331.84±220.26ns   | 1292.2±259.81ns    | 1711.77±346.56ns   | 1438.87±306.41ns  |
| Acetylene degradation                                  | 15846.07±4111.87ns | 18050.91±1448.38ns | 18109.39±1695.12ns | 19238.77±1489.54ns | 17488.41±539.02ns |
| L-glutamate degradation V (via hydroxyglutarate)       | 27.86±8.28ns       | 72.16±11.91ns      | 102.58±15.59ns     | 587.13±466.17ns    | 153.7±64ns        |
| Purine nucleobases degradation I (anaerobic)           | 18800.60±4899.30b  | 21717.94±1061.07ab | 22566.77±284.72ab  | 23233.82±566.72a   | 23424.32±630.37a  |
| Protocatechuate degradation I (meta-cleavage pathway)  | 1065.1±259.99b     | 1443.28±89.22a     | 1374.51±75.21ab    | 1469.87±67.01a     | 1489.36±126.76a   |
| 3-phenylpropanoate degradation                         | 1431.65±422.70b    | 2060.82±177.19ab   | 2219.25±200.96ab   | 2265.19±161.00a    | 2633.73±333.59a   |
| Superpathway of N-acetylneuraminate degradation        | 7199.93±1523.95b   | 8251.18±622.34ab   | 9023.08±959.36ab   | 11271.77±1708.91a  | 8682.18±637.76ab  |

|                                                             |                    |                   |                   |                    |                   |
|-------------------------------------------------------------|--------------------|-------------------|-------------------|--------------------|-------------------|
| Myo-inositol degradation I                                  | 2231.36±664.51b    | 2866±268.71ab     | 3153.45±361.90ab  | 3253.13±258.49ab   | 3552.46±365.04a   |
| Nylon-6 oligomer degradation                                | 360.41±180.26ns    | 464.46±25.07ns    | 478.23±27.89ns    | 476.22±21.19ns     | 510.47±54.74ns    |
| Protocatechuate degradation II (ortho-cleavage pathway)     | 10580.78±2708.81b  | 13570.41±514.44a  | 13657.11±600.83a  | 14454.33±451.92a   | 14748.3±723.85a   |
| Benzoyl-coa degradation I (aerobic)                         | 109.35±24.55b      | 345.01±57.66a     | 337.11±46.79a     | 315.98±31.69a      | 363.63±39.06a     |
| Mandelate degradation I                                     | 29.14±14.79ns      | 20.11±3.17ns      | 21.89±3.57ns      | 20.26±2.38ns       | 27.95±4.39ns      |
| Superpathway of taurine degradation                         | 255.23±42.45b      | 371.57±36.11a     | 444.67±37.84a     | 441.97±19.34a      | 437.76±42.18a     |
| Glycine betaine degradation I                               | 2137±637.32b       | 2768.31±201.02ab  | 3338.26±406.64ab  | 3533.09±421.92a    | 3207.79±340.05ab  |
| Sucrose degradation II (sucrose synthase)                   | 5186.59±1350.99ns  | 7209.04±1306.25ns | 8912.71±2126.48ns | 10413.63±2158.68ns | 8176.72±1259.93ns |
| S-methyl-5-thio- $\alpha$ -D-ribose 1-phosphate degradation | 2010.8±1035.77a    | 811.68±81.38b     | 980.38±130.78b    | 916.21±79.18b      | 848.57±106.22b    |
| Creatinine degradation II                                   | 91.66±17.40ns      | 99.52±13.45ns     | 110.46±17.56ns    | 106.12±8.22ns      | 119.96±17.83ns    |
| 4-aminobutanoate degradation V                              | 15823.64±4222.39ns | 17598±861.32ns    | 18396.52±551.98ns | 18629.33±429.66ns  | 18813.06±609.07ns |

|                                                             |                   |                  |                  |                  |                  |
|-------------------------------------------------------------|-------------------|------------------|------------------|------------------|------------------|
| L-histidine degradation II                                  | 6286.14±1618.49ns | 7599.27±873.63ns | 8128.39±643.05ns | 7736.42±608.26ns | 7609.07±679.93ns |
| L-glutamate degradation VIII (to<br>propanoate)             | 13.94±11.03ns     | 41.12±6.47ns     | 53.02±8.62ns     | 150.86±94.96ns   | 57.18±19.05ns    |
| Glutaryl-coa degradation                                    | 14±4.16ns         | 36.98±6.40ns     | 52.92±8.26ns     | 419.76±356.16ns  | 82.56±35.87ns    |
| Toluene degradation IV (aerobic) (via<br>catechol)          | 545.49±123.78b    | 1018.18±87.85a   | 1017.7±81.97a    | 1168.75±133.97a  | 1220.72±151.07a  |
| Toluene degradation I (aerobic) (via o-<br>cresol)          | 6250.48±1732.11ns | 7188.84±373.53ns | 7153.51±351.37ns | 7439.68±304.3ns  | 7360.27±463.94ns |
| Toluene degradation III (aerobic) (via p-<br>cresol)        | 2668.36±655.53b   | 3307.04±174.79ab | 3268.93±212.83ab | 3587.86±220.54a  | 3381.4±266.38ab  |
| Toluene degradation II (aerobic) (via 4-<br>methylcatechol) | 6250.48±1732.11ns | 7188.84±373.53ns | 7153.51±351.37ns | 7439.68±304.3ns  | 7360.27±463.94ns |

|                                                   |                   |                  |                    |                   |                  |
|---------------------------------------------------|-------------------|------------------|--------------------|-------------------|------------------|
| Superpathway of aerobic toluene degradation       | 723.54±169.62b    | 1242.52±107.59a  | 1258.26±88.61a     | 1391.98±137.99a   | 1399.1±182.71a   |
| Toluene degradation VI (anaerobic)                | 0.00±0.00a        | 0.46±0.22ab      | 2.05±0.97a         | 1.25±0.49ab       | 0.73±0.46ab      |
| P-cymene degradation                              | 1918.72±1918.72ns | 774.4±774.40ns   | 911.16±419.78ns    | 471.79±471.79ns   | 819.52±518.75ns  |
| Sucrose degradation IV (sucrose phosphorylase)    | 8178.29±1482.63ns | 9314.72±367.8ns  | 10417.88±1008.88ns | 10277.31±644.22ns | 9367.44±332.58ns |
| Catechol degradation I (meta-cleavage pathway)    | 5668.18±1502.63ns | 6378.3±351.01ns  | 6443.59±395.15ns   | 6590.04±289.85ns  | 6572.18±426.93ns |
| Catechol degradation III (ortho-cleavage pathway) | 1568.42±373.09b   | 2093.83±132.12a  | 1947.5±88.58ab     | 2104.94±97.44a    | 2051.91±116.32a  |
| Catechol degradation to 2-oxopent-4-enoate II     | 5412.86±1361.59ns | 5887.26±348.15ns | 6239.59±299.25ns   | 6426.45±233.78ns  | 6124.21±227.58ns |



|                                                                       |                    |                    |                   |                   |                    |
|-----------------------------------------------------------------------|--------------------|--------------------|-------------------|-------------------|--------------------|
| Catechol degradation II (meta-cleavage pathway)                       | 5580.36±1469.63ns  | 6097.3±395.42ns    | 6165.21±280.62ns  | 6317.6±216.79ns   | 6165.14±269.36ns   |
| Aromatic compounds degradation via β-ketoadipate                      | 1568.42±373.09b    | 2093.83±132.12a    | 1947.5±88.58ab    | 2104.94±97.44a    | 2051.91±116.32a    |
| Adenosine nucleotides degradation IV                                  | 247.29±121.33b     | 537.78±94.04ab     | 572.29±81.67a     | 473.86±11.16ab    | 706.15±125.31a     |
| 2-nitrobenzoate degradation I                                         | 3140.95±821.62ns   | 3143.16±316.9ns    | 3529.33±368.6ns   | 3345.69±270.26ns  | 3046.96±202.04ns   |
| L-tryptophan degradation to 2-amino-3-carboxymuconate semialdehyde    | 6717.35±1620.50ns  | 8402.88±1066.25ns  | 8524.13±611.73ns  | 8306.27±747.80ns  | 7652.02±636.96ns   |
| 2-amino-3-carboxymuconate semialdehyde degradation to 2-oxopentenoate | 3045.55±821.48ns   | 2880.51±282.30ns   | 3263.62±348.77ns  | 3088.79±238.70ns  | 2829.81±170.07ns   |
| L-tryptophan degradation IX                                           | 4628.19±1230.57ns  | 4849.15±491.92ns   | 5130.94±422.11ns  | 4978.97±333.3ns   | 4635.22±255.12ns   |
| Urate biosynthesis/inosine 5'-phosphate degradation                   | 39218.29±10186.61b | 46373.31±3571.95ab | 47297.22±960.01ab | 50521.87±1095.70a | 46963.71±1478.57ab |

|                                                       |                   |                   |                    |                   |                  |
|-------------------------------------------------------|-------------------|-------------------|--------------------|-------------------|------------------|
| Allantoin degradation to glyoxylate III               | 1860.97±519.40b   | 2475.33±197.06ab  | 2607.12±205.24ab   | 3076.76±257.50a   | 2906.47±348.77a  |
| Glycogen degradation II (eukaryotic)                  | 2035.73±598.98b   | 2450.95±188.26ab  | 2626.79±196.36ab   | 3181.11±158.19a   | 2775.07±261ab    |
| Superpathway of phenylethylamine<br>degradation       | 2501.21±648.35b   | 3233.08±204ab     | 3238.43±167.25ab   | 3535.64±224.52a   | 3564.89±230.36a  |
| Chlorosalicylate degradation                          | 12.57±4.98ns      | 18.01±3.60ns      | 16.28±1.14ns       | 22.8±6.03ns       | 16.78±2.56ns     |
| Superpathway of salicylate degradation                | 1582.85±377.62b   | 2119.42±102.90a   | 2019.03±74.63a     | 2178.74±95.45a    | 2132.09±121.26a  |
| 4-methylcatechol degradation (ortho<br>cleavage)      | 2213.76±630.65ns  | 2422.87±265.64ns  | 2170.48±173.46ns   | 2270.74±120.30ns  | 2173.23±115.19ns |
| Sucrose degradation III (sucrose invertase)           | 8178.29±1482.63ns | 9314.72±367.8ns   | 10417.88±1008.88ns | 10729.17±890.44ns | 9367.44±332.58ns |
| 2-aminophenol degradation                             | 1136.68±281.14b   | 1585.57±77.25a    | 1693.14±103.67a    | 1689.38±91.46a    | 1669.06±137.34a  |
| Galactose degradation I (Leloir pathway)              | 22998.56±5447.35b | 28799.53±1532.01a | 30509.89±585.32a   | 32329.4±1271.99a  | 31002.94±445.03a |
| Superpathway of vanillin and vanillate<br>degradation | 808.48±193.10b    | 1082.06±88.32a    | 1030.37±88.16ab    | 1104.54±70.92a    | 1093.59±114.86a  |

|                                                                       |                   |                    |                   |                   |                   |
|-----------------------------------------------------------------------|-------------------|--------------------|-------------------|-------------------|-------------------|
| Syringate degradation                                                 | 1341.44±331.87b   | 1840.68±128.15ab   | 1715.57±98.46a    | 1829.49±78.60a    | 1874.45±161.66a   |
| Purine nucleotides degradation II (aerobic)                           | 31421.31±7639.54b | 37164.62±2051.23ab | 38789.81±961.01a  | 40507.7±817.44a   | 38362.25±1060.40a |
| L-tryptophan degradation XII<br>(Geobacillus)                         | 2514.47±635.14b   | 3267.06±172.68a    | 3426.13±179.01a   | 3417.96±149.72a   | 3339.07±216.17a   |
| 4-deoxy-L-threo-hex-4-enopyranuronate<br>degradation                  | 9674.2±2292.87ns  | 10448.88±770.74ns  | 11244.75±463.94ns | 12185.06±572.98ns | 10841.42±306.79ns |
| Chondroitin sulfate degradation I<br>(bacterial)                      | 6.51±6.51b        | 22.22±6.43ab       | 29.89±9.2ab       | 87.22±39.43a      | 46.18±16.42ab     |
| Guanosine nucleotides degradation III                                 | 32160.14±7765.9b  | 38815.36±2474.44ab | 41103.39±817.64a  | 42468.22±1042.66a | 40414.12±1264.47a |
| Superpathway of sulfolactate degradation                              | 421.76±125.84b    | 790.89±52.29ab     | 909.85±81.81a     | 1005.08±63.85a    | 954.05±111.41a    |
| Cinnamate and 3-hydroxycinnamate<br>degradation to 2-oxopent-4-enoate | 203.61±46.15b     | 624.05±134.18ab    | 605.32±126.32ab   | 756.36±166.71a    | 700±131.52a       |
| L-rhamnose degradation II                                             | 6.59±1.53ns       | 8.10±3.15ns        | 14.72±4.42ns      | 57.97±39.68ns     | 16.44±7.72ns      |

|                                                |                   |                    |                   |                   |                    |
|------------------------------------------------|-------------------|--------------------|-------------------|-------------------|--------------------|
| Starch degradation III                         | 777.68±216.82ns   | 563.12±72.16ns     | 610.07±95.48ns    | 597.23±91.63ns    | 506.34±24.44ns     |
| Starch degradation V                           | 25119.49±5832.99b | 29996.52±1356.93ab | 32192.61±1069.05a | 34744.8±1623.15a  | 31496.47±737.02a   |
| Superpathway of glucose and xylose degradation | 18569.94±4521.97c | 21764.02±803.97bc  | 23905.54±532.04ab | 27029.16±1856.92a | 24136.02±1270.87ab |
| Chitin derivatives degradation                 | 72.83±23.17b      | 165.47±31.54ab     | 153.96±20.99ab    | 244.51±48.23a     | 203.69±54.11ab     |
| Androstenedione degradation                    | 914.43±229.17b    | 1406.12±122.42ab   | 1450.06±164.02a   | 1558.61±160.58a   | 1652.4±164.07a     |
| Sitosterol degradation to androstenedione      | 76.68±16.64ns     | 279.1±133.47ns     | 263.87±138.25ns   | 342.78±176.5ns    | 318.12±116.55ns    |
| Mandelate degradation to acetyl-coa            | 106.7±50.44ns     | 80.32±11.87ns      | 85.99±13.02ns     | 80.21±8.39ns      | 108.65±16.68ns     |
| 1,5-anhydrofructose degradation                | 768.42±200.99ns   | 903.72±50.31ns     | 1062.57±137.39ns  | 1099.56±108.76ns  | 1066.45±102.13ns   |
| 4-hydroxyacetophenone degradation              | 0.00±0.00ns       | 3.00±1.53ns        | 2.47±1.68ns       | 2.85±1.80ns       | 5.36±3.22ns        |
| Glycerol degradation to butanol                | 2540.04±769.67ns  | 2084.93±151.64ns   | 2441.92±183.96ns  | 3079.04±687.48ns  | 2240.92±226.95ns   |
| L-1,2-propanediol degradation                  | 350.46±58.8ns     | 1129.08±485.32ns   | 1004.74±422.82ns  | 1484.25±609.80ns  | 1286.57±414.41ns   |
| 4-coumarate degradation (anaerobic)            | 20.47±3.30b       | 37±3.92a           | 37.82±2.02a       | 46.73±3.45a       | 40.06±5.16a        |

|                                                           |                   |                   |                   |                  |                   |
|-----------------------------------------------------------|-------------------|-------------------|-------------------|------------------|-------------------|
| Vanillin and vanillate degradation I                      | 808.48±193.10ns   | 1082.06±88.32ns   | 1030.37±88.16ns   | 1104.54±70.92ns  | 1093.59±114.86ns  |
| Vanillin and vanillate degradation II                     | 888.54±215.33ns   | 1180.64±94.70ns   | 1123.99±94.47ns   | 1204.4±74.99ns   | 1192.98±123.76ns  |
| Superpathway of pyrimidine<br>ribonucleosides degradation | 19.14±3.00b       | 20.25±1.88b       | 22.61±1.52ab      | 19.42±2.85b      | 28.70±3.26a       |
| Nicotinate degradation I                                  | 112.86±33.75b     | 180.91±12.50a     | 177.27±13.75a     | 212.90±12.94a    | 207.75±24.21a     |
| Myo-, chiro- and scillo-inositol<br>degradation           | 2883.86±896.85b   | 3907.32±366.80ab  | 4373±537.54ab     | 4402.92±370.89ab | 4910.5±500.14a    |
| D-fructuronate degradation                                | 11705.8±2701.54c  | 14332.34±754.33bc | 15547.58±283.07ab | 17341.06±841.03a | 15367.32±650.06ab |
| L-arabinose degradation IV                                | 608.75±184.80b    | 763.42±57.51ab    | 782.87±105.73ab   | 921.82±39.89a    | 848.3±59.71ab     |
| Aromatic biogenic amine degradation<br>(bacteria)         | 10783.41±2706.83b | 12482.69±621.8ab  | 13642.22±324.32a  | 14546.59±459.50a | 13624.3±436.80a   |
| Mannan degradation                                        | 1865.39±491.62ns  | 2294.63±379.48ns  | 2358.64±320.59ns  | 3000.89±640.22ns | 3288.69±662.90ns  |
| Heparin degradation                                       | 15.48±3.78b       | 70.63±25.54ab     | 72.59±13.92ab     | 136.03±35.83a    | 101.92±29.62ab    |

|                                                                  |                    |                    |                   |                    |                   |
|------------------------------------------------------------------|--------------------|--------------------|-------------------|--------------------|-------------------|
| 3-phenylpropanoate and 3-(3-hydroxyphenyl)propanoate degradation | 723.8±155.40b      | 1835.67±311.85a    | 1803.37±297.03a   | 2114.16±366.60a    | 2023.78±317.23a   |
| Purine ribonucleosides degradation                               | 13158.19±3564.73b  | 14421.26±681.88ab  | 15442.67±265.80ab | 17517.02±1160.73a  | 15780.39±564.33ab |
| Superpathway of purine deoxyribonucleosides degradation          | 15341.47±3744.58ns | 17751.03±1090.48ns | 18203.77±1194.6ns | 19461.14±1101.93ns | 17675.88±493.75ns |
| Superpathway of pyrimidine deoxyribonucleosides degradation      | 12846.07±3131.37ns | 14568.76±963.7ns   | 14926.48±746.69ns | 16158.63±922.79ns  | 14567.07±322ns    |
| Methylphosphonate degradation I                                  | 2424.93±639.56b    | 3741.47±257.52a    | 4143.7±246.88a    | 4395.53±237.1a     | 4294.8±443.67a    |
| Phenylacetate degradation I (aerobic)                            | 4208.89±1050.41ns  | 4847.54±325.12ns   | 4758.23±404.49ns  | 5056.95±273.76ns   | 4699.33±351.46ns  |
| Allantoin degradation IV (anaerobic)                             | 134.69±22.11ns     | 159.57±23.93ns     | 205.99±30.32ns    | 271.37±75.46ns     | 257.36±65.66ns    |
| L-rhamnose degradation I                                         | 4750.02±1314.41b   | 5598.71±216.68ab   | 6023.91±329.46ab  | 6527.55±254.2a     | 6530.93±306.48a   |
| Adenosine nucleotides degradation II                             | 31572.32±7758.93b  | 38179.46±2561.26ab | 40096.47±827.73a  | 41443.3±906.17a    | 39616.13±1254.47a |
| L-tyrosine degradation I                                         | 12492.92±4097.10ns | 14911.64±2137.62ns | 14025.6±974.13ns  | 14146.52±646.14ns  | 13395.31±856.12ns |

|                        |               |               |               |              |               |
|------------------------|---------------|---------------|---------------|--------------|---------------|
| L-valine degradation I | 117.75±28.15b | 337.06±44.20a | 383.08±48.84a | 365.2±36.18a | 384.52±59.04a |
|------------------------|---------------|---------------|---------------|--------------|---------------|

**Table S2** Differences in the number of functional gene pathways of soil bacterial communities involved in the decomposition process treated with the leaves of the four invasive plants and *P. laciniata*. Data (means and SE;  $n = 15$ ) with different letters in a transverse column indicate statistically significant differences ( $P < 0.05$ ). The number of functional gene pathways of soil bacterial communities of most samples that lower than one was not shown in this table. Abbreviations: PL, *Pterocypsela laciniata* (Houtt.) Shih; BP, *Bidens pilosa* L.; CC, *Conyza canadensis* (L.) Cronq.; SC, *Solidago canadensis* L.; SS, *Symphyotrichum subulatum* (Michx.) G.L. Nesom.

|                                                                          | PL               | BP              | CC               | SC               | SS              |
|--------------------------------------------------------------------------|------------------|-----------------|------------------|------------------|-----------------|
| 4-hydroxyphenylacetate degradation                                       | 1644.6±82.04b    | 1954.54±64ab    | 2108.31±149.84a  | 1808.66±111.32ab | 1792.92±52.55b  |
| Superpathway of L-arginine, putrescine, and 4-aminobutanoate degradation | 20.96±4.85ns     | 24.37±8.26ns    | 23.9±3.07ns      | 16.74±2.62ns     | 34.82±19.53ns   |
| L-arginine degradation II (AST pathway)                                  | 3761.83±156.99a  | 3182.52±136.14b | 3281.1±217.67ab  | 2625.31±142.61c  | 2616.91±197.03c |
| Anaerobic aromatic compound degradation<br>(Thauera aromatica)           | 2.21±0.64ab      | 3.12±1.46a      | 1.63±0.37ab      | 0.21±0.21b       | 0.72±0.44ab     |
| Catechol degradation to β-ketoadipate                                    | 2020.73±101.16ns | 1897.23±82.06ns | 2062.66±100.02ns | 2287.87±249.08ns | 1889.61±62.02ns |



|                                                          |                   |                  |                   |                  |                   |
|----------------------------------------------------------|-------------------|------------------|-------------------|------------------|-------------------|
| Benzoyl-coa degradation II (anaerobic)                   | 10.95±0.74ab      | 15.23±1.07a      | 13.82±1.60a       | 13.45±2.43a      | 8.33±0.71b        |
| Creatinine degradation I                                 | 3344.44±214.83b   | 4394.78±130.95a  | 4269.32±347.7a    | 3290.13±332.92b  | 2499.71±43.47c    |
| Glucose degradation (oxidative)                          | 421.95±99.89ab    | 345.69±21.67ab   | 508.76±145.58a    | 355.66±73.56ab   | 217.1±26.35b      |
| Superpathway of fucose and rhamnose<br>degradation       | 231.52±37.91ns    | 254.7±27.88ns    | 401.16±77.14ns    | 293.31±20.07ns   | 585.77±286.42ns   |
| Fucose degradation                                       | 1250.33±130.53ns  | 1075.33±117.04ns | 1180.01±163.02ns  | 1054.51±100.70ns | 1207.49±238.09ns  |
| Superpathway of hexuronide and hexuronate<br>degradation | 8493.1±453.96ns   | 7263.28±267.48ns | 7673.26±377.51ns  | 7303.4±537.98ns  | 7194.11±395.29ns  |
| D-galactarate degradation I                              | 1905.89±76.48ns   | 2079.44±67.34ns  | 2228.96±87.39ns   | 2296.37±169.99ns | 2237.44±197.13ns  |
| D-galacturonate degradation I                            | 16785.31±904.44ns | 15076.16±530.7ns | 14878.05±784.16ns | 14348.3±933.78ns | 14681.51±770.23ns |
| Gallate degradation II                                   | 1270.87±29.09ns   | 1093±17.87ns     | 1216.24±61.33ns   | 1389.82±182.34ns | 1127.3±98.12ns    |
| Gallate degradation I                                    | 965.28±51.7a      | 684.88±15.4bc    | 861.63±44.15ab    | 847.47±108.66a-c | 655.89±51.85c     |

|                                                                                              |                    |                    |                   |                   |                    |
|----------------------------------------------------------------------------------------------|--------------------|--------------------|-------------------|-------------------|--------------------|
| Superpathway of N-acetylglucosamine, N-acetylmannosamine and N-acetylneuraminate degradation | 3787.39±361.57ns   | 5122.38±260.99ns   | 4754.35±316.13ns  | 5157.63±350.82ns  | 5197.8±1069.5ns    |
| D-glucarate degradation I                                                                    | 1913.15±120.98ns   | 1876.6±51.25ns     | 2196.98±141.05ns  | 2184.41±102.85ns  | 2082.89±207.76ns   |
| Superpathway of D-glucarate and D-galactarate degradation                                    | 1905.89±76.48ns    | 2079.44±67.34ns    | 2228.96±87.39ns   | 2296.37±169.99ns  | 2237.44±197.13ns   |
| Glucose and glucose-1-phosphate degradation                                                  | 9774.32±1231.25ns  | 12221.97±1169.1ns  | 10298.25±464.57ns | 12735.1±1578.44ns | 10602.42±350.94ns  |
| Superpathway of β-D-glucuronide and D-glucuronate degradation                                | 7840.01±415.51ns   | 6681.02±226.11ns   | 7747.61±286.06ns  | 7121.34±562.81ns  | 6667.52±391.49ns   |
| Glycogen degradation I (bacterial)                                                           | 34718.57±1669.39ns | 36637.31±1071.59ns | 31991.69±811.49ns | 34434.41±2299.6ns | 33124.61±2313.12ns |
| Superpathway of glycol metabolism and degradation                                            | 83.64±18.38ns      | 90.15±11.65ns      | 158.86±36.34ns    | 105.65±9.6ns      | 221.16±116.64ns    |

|                                                                                        |                  |                  |                   |                    |                  |
|----------------------------------------------------------------------------------------|------------------|------------------|-------------------|--------------------|------------------|
| Superpathway of glycerol degradation to 1,3-propanediol                                | 883.35±53.93a    | 631.04±58.95b    | 701.67±48.07ab    | 660.15±69.39ab     | 634.72±115.59b   |
| 3-phenylpropanoate and 3-(3-hydroxyphenyl)propanoate degradation to 2-oxopent-4-enoate | 1038.81±137.04a  | 599.26±35.96bc   | 828.28±123.79ab   | 596.83±51.00bc     | 484.70±40.03c    |
| Superpathway of hexitol degradation (bacteria)                                         | 2784.22±275.41b  | 3500.87±243.33ab | 3346.64±312.52ab  | 3382.94±271.08ab   | 4438.48±924.09a  |
| L-histidine degradation I                                                              | 31608.02±703.72a | 28613.56±592.65b | 27641.89±545.13bc | 25327.58±1592.15c  | 25396.42±638.42c |
| Lactose and galactose degradation I                                                    | 53.4±18.89ns     | 214.02±89.79ns   | 209.22±57.99ns    | 145.59±49.10ns     | 432.81±337.67ns  |
| L-leucine degradation I                                                                | 32774.75±726.24a | 28981.04±674.02b | 28272.57±553.68bc | 26100.72±1746.32bc | 25709.12±574.08c |
| Superpathway of methylglyoxal degradation                                              | 172.7±29.62ns    | 85.95±7.04ns     | 134.38±23.57ns    | 83.77±10.74ns      | 152.91±55.69ns   |
| Methylgallate degradation                                                              | 1567.82±33.68ns  | 1354.32±22.24ns  | 1503.26±74.47ns   | 1716.5±223.26ns    | 1394.74±119.43ns |
| Superpathway of L-arginine and L-ornithine degradation                                 | 20.96±4.85ns     | 24.37±8.26ns     | 23.90±3.07ns      | 16.74±2.62ns       | 34.82±19.53ns    |

|                                                          |                   |                    |                   |                    |                    |
|----------------------------------------------------------|-------------------|--------------------|-------------------|--------------------|--------------------|
| Superpathway of ornithine degradation                    | 1690.78±235.32ns  | 1454.84±231.32ns   | 1999.58±289.67ns  | 1372.03±263.00ns   | 1455.42±298.79ns   |
| Acetylene degradation                                    | 16397.17±1164.69b | 18879.64±1449.87ab | 17404.87±371.63ab | 21180.57±1813.35a  | 18677.83±1644.36ab |
| L-glutamate degradation V (via<br>hydroxyglutarate)      | 67.54±9.35ns      | 60.34±7.41ns       | 199.71±71.33ns    | 78.74±6.94ns       | 688.96±556.64ns    |
| Purine nucleobases degradation I (anaerobic)             | 23676.09±870.74ns | 23465.96±511.65ns  | 21966.85±194.11ns | 22800.09±1653.41ns | 22656.26±415.34ns  |
| Protocatechuate degradation I (meta-cleavage<br>pathway) | 1594.07±40.75ns   | 1362.77±17.08ns    | 1489.3±69.86ns    | 1649.08±210.06ns   | 1357.66±121.26ns   |
| 3-phenylpropanoate degradation                           | 1885.17±114.21c   | 2395.79±170.52bc   | 2474.94±59.08b    | 3081.18±338.58a    | 2590.27±104.56ab   |
| Superpathway of N-acetylneuraminate<br>degradation       | 7186.42±908.16ns  | 10367.49±623.06ns  | 9332.99±512.22ns  | 10479.04±968.00ns  | 10534.88±2222.96ns |
| Myo-inositol degradation I                               | 2827.28±158.29c   | 2999.7±180.74c     | 3753.22±265.19ab  | 4053.95±310.77a    | 3298.25±116.75bc   |
| Nylon-6 oligomer degradation                             | 493.49±7.04ab     | 488.24±10.80ab     | 456.04±37.61b     | 589.98±75.82a      | 456.39±16.58b      |

|                                                             |                   |                   |                   |                    |                   |
|-------------------------------------------------------------|-------------------|-------------------|-------------------|--------------------|-------------------|
| Protocatechuate degradation II (ortho-cleavage pathway)     | 14520.44±244.56a  | 14370.49±473.7ab  | 15246.47±375.53a  | 14848.22±1005.37a  | 12765.43±292.64b  |
| Benzoyl-coa degradation I (aerobic)                         | 318.57±44.57ns    | 339.69±21.79ns    | 409.15±17.15ns    | 327.23±27.42ns     | 402.96±45.06ns    |
| Mandelate degradation I                                     | 20.33±5.31ns      | 37.29±2.88ns      | 21.68±2.19ns      | 33.1±9.41ns        | 27.23±5.44ns      |
| Superpathway of taurine degradation                         | 370.28±39.11ns    | 459.78±15.46ns    | 464.02±17.39ns    | 457.35±42.30ns     | 410.18±37.49ns    |
| Glycine betaine degradation I                               | 3042.53±464.24bc  | 3075.54±33.82bc   | 4117.74±344.28a   | 3587.77±422.69ab   | 2409.3±141.34c    |
| Sucrose degradation II (sucrose synthase)                   | 5448.73±996.12b   | 10909.86±1702.99a | 5959.01±1234.71ab | 10218.03±2308.56ab | 9231.82±1815.2ab  |
| S-methyl-5-thio- $\alpha$ -D-ribose 1-phosphate degradation | 891.67±106.25ab   | 1026.14±105.85a   | 849.95±133.84ab   | 674.68±17.26b      | 842.31±60.87ab    |
| Creatinine degradation II                                   | 113.25±18.42ab    | 115.54±5.56ab     | 125.12±7.48a      | 80.81±14.37b       | 100.12±12.27ab    |
| 4-aminobutanoate degradation V                              | 19129.64±510.93ns | 18643.64±321.82ns | 18885.22±374.35ns | 18201.91±1195.16ns | 17046.87±389.15ns |
| L-histidine degradation II                                  | 9042.86±305.99a   | 7922.38±479.94a   | 8048.84±332.13a   | 6411.11±650.54b    | 6147.95±357.62b   |
| L-glutamate degradation VIII (to propanoate)                | 29.74±4.11ns      | 52.26±4.77ns      | 78.27±18.82ns     | 50.2±4.87ns        | 175.19±112.22ns   |

|                                                         |                   |                    |                  |                   |                  |
|---------------------------------------------------------|-------------------|--------------------|------------------|-------------------|------------------|
| Glutaryl-coa degradation                                | 34.39±4.86ns      | 30.59±3.77ns       | 107.87±40.13ns   | 40.14±3.61ns      | 495.42±426.02ns  |
| Toluene degradation IV (aerobic) (via catechol)         | 1025.73±80.71b    | 1022.38±34.43b     | 1389.42±94.5a    | 1296.85±102.06a   | 1047.77±71.72b   |
| Toluene degradation I (aerobic) (via o-cresol)          | 7640.92±202.87ab  | 7156.28±127.99bc   | 8208.57±202.26a  | 7531.59±520.76ab  | 6387.3±200.00c   |
| Toluene degradation III (aerobic) (via p-cresol)        | 3659.9±100.03ab   | 3420.63±98.23a-c   | 3891.4±254.37a   | 3153.74±176.53bc  | 2966.17±182.89c  |
| Toluene degradation II (aerobic) (via 4-methylcatechol) | 7640.92±202.87ab  | 7156.28±127.99bc   | 8208.57±202.26a  | 7531.59±520.76ab  | 6387.3±200.00c   |
| Superpathway of aerobic toluene degradation             | 1202.95±69.34c    | 1315.06±36.22bc    | 1633.75±92.13a   | 1549.96±120.04ab  | 1217.48±62.64c   |
| Toluene degradation VI (anaerobic)                      | 1.64±0.49ab       | 2.31±1.12a         | 1.32±0.36ab      | 0.15±0.15b        | 0.55±0.34ab      |
| P-cymene degradation                                    | 0.00±0.00b        | 316.45±316.45b     | 508.38±508.38b   | 2813.16±479.92a   | 322.32±322.32b   |
| Sucrose degradation IV (sucrose phosphorylase)          | 9221.39±1177.50ns | 11395.92±1101.25ns | 9587.29±398.51ns | 11793.1±1463.74ns | 9868.65±358.23ns |
| Catechol degradation I (meta-cleavage pathway)          | 7041.11±190.82ab  | 6261.00±141.72bc   | 7215.47±230.99a  | 6776.25±506.45ab  | 5577.52±198.96c  |

|                                                                       |                 |                  |                  |                  |                 |
|-----------------------------------------------------------------------|-----------------|------------------|------------------|------------------|-----------------|
| Catechol degradation III (ortho-cleavage pathway)                     | 2135.41±79.06ns | 1969.52±63.62ns  | 2138.91±120.17ns | 2201.88±232.04ns | 1883.24±94.88ns |
| Catechol degradation to 2-oxopent-4-enoate II                         | 6694.19±150.49a | 6324.71±180.48a  | 6360.64±235.71a  | 5538.63±302.83b  | 5586.32±173.97b |
| Catechol degradation II (meta-cleavage pathway)                       | 6726.02±180.01a | 6115.75±87.05a-c | 6581.23±195.29ab | 5929.03±364.25bc | 5469.02±191.88c |
| Aromatic compounds degradation via β-ketoadipate                      | 2135.41±79.06ns | 1969.52±63.62ns  | 2138.91±120.17ns | 2201.88±232.04ns | 1883.24±94.88ns |
| Adenosine nucleotides degradation IV                                  | 471.05±44.29ns  | 620.14±135.41ns  | 591.74±99.77ns   | 739.37±109.96ns  | 535±64.67ns     |
| 2-nitrobenzoate degradation I                                         | 3926.93±131.37a | 3152.76±209.53b  | 3178.78±128.10b  | 2447.55±133.40c  | 2685.96±122.68c |
| L-tryptophan degradation to 2-amino-3-carboxymuconate semialdehyde    | 9938.98±544.23a | 8072.69±708.03b  | 7684.6±204.61bc  | 5964.14±360.04d  | 6584.79±81.59cd |
| 2-amino-3-carboxymuconate semialdehyde degradation to 2-oxopentenoate | 3600.6±123.40a  | 2911.9±170.01bc  | 2964.05±118.51b  | 2327.89±132.57d  | 2508.1±146.34cd |

|                                                     |                   |                    |                   |                    |                    |
|-----------------------------------------------------|-------------------|--------------------|-------------------|--------------------|--------------------|
| L-tryptophan degradation IX                         | 5727.66±91.20a    | 4745.56±246.38b    | 4862.91±162.28b   | 3903.42±216.60c    | 4067.43±141.21c    |
| Urate biosynthesis/inosine 5'-phosphate degradation | 50470.61±1327.82a | 48553.69±1061.44ab | 47479.42±663.85ab | 45755.19±3061.52ab | 44147.38±2367.69b  |
| Allantoin degradation to glyoxylate III             | 2480.18±156.08bc  | 2924.28±117.26ab   | 3500.24±245.26a   | 3111±250.84a       | 2323.8±109.23c     |
| Glycogen degradation II (eukaryotic)                | 2459.45±151.48ns  | 2391.82±79.88ns    | 2971.3±255.58ns   | 2986.59±270.04ns   | 2628.6±242.24ns    |
| Superpathway of phenylethylamine degradation        | 3749.15±113.17a   | 3443.38±96.21ab    | 3800.98±214.95a   | 3415.8±188.12ab    | 3225.01±123.09b    |
| Chlorosalicylate degradation                        | 13.07±0.64ns      | 21.11±1.55ns       | 18.64±3.00ns      | 23.36±3.25ns       | 22.08±7.44ns       |
| Superpathway of salicylate degradation              | 2172.4±61.07ns    | 2054.87±59.50ns    | 2246.11±112.99ns  | 2304.46±239.24ns   | 1962.82±88.62ns    |
| 4-methylcatechol degradation (ortho cleavage)       | 2461.21±121.00ns  | 2151.56±75.54ns    | 2333.73±122.17ns  | 2074.82±189.67ns   | 2103.25±144.16ns   |
| Sucrose degradation III (sucrose invertase)         | 9221.39±1177.50ns | 11395.92±1101.25ns | 9587.29±398.51ns  | 11793.1±1463.74ns  | 10410.89±890.88ns  |
| 2-aminophenol degradation                           | 1812.00±41.02a    | 1640.75±107.65ab   | 1848.48±91.70a    | 1624.13±103.46ab   | 1501.69±57.82b     |
| Galactose degradation I (Leloir pathway)            | 32101.82±915.23ns | 32447.53±693.25ns  | 29893.91±746.34ns | 29289.89±1633.35ns | 29920.05±1704.38ns |



|                                                                    |                    |                   |                    |                    |                   |
|--------------------------------------------------------------------|--------------------|-------------------|--------------------|--------------------|-------------------|
| Superpathway of vanillin and vanillate degradation                 | 1254.07±55.10a     | 940.63±14.51b     | 1095.77±40.94ab    | 1130.60±133.08ab   | 907.45±75.30b     |
| Syringate degradation                                              | 1994.34±59.38ns    | 1667.56±24.42ns   | 1908.58±92.47ns    | 2090.33±301.28ns   | 1725.08±162.89ns  |
| Purine nucleotides degradation II (aerobic)                        | 39621.29±1299.57ns | 40586.42±865.65ns | 38312.95±611.02ns  | 38826.95±2332.49ns | 36201.3±1528.66ns |
| L-tryptophan degradation XII (Geobacillus)                         | 3746.37±69.35a     | 3326.26±176.43ab  | 3624.35±141.31a    | 3170.78±183.30b    | 2992.14±100.59b   |
| 4-deoxy-L-threo-hex-4-enopyranuronate degradation                  | 12711.66±888.80a   | 11427.27±421.63ab | 10853.09±555.57ab  | 10084.07±733.29b   | 10961.43±551.11ab |
| Chondroitin sulfate degradation I (bacterial)                      | 13.44±2.91b        | 38.75±17.78b      | 40.59±13.81b       | 37.18±9.46b        | 108.64±42.79a     |
| Guanosine nucleotides degradation III                              | 43066.28±771.74a   | 41790.18±1018.4ab | 40279.57±876.85a-c | 38447.76±2338.74bc | 37096.9±1332.89c  |
| Superpathway of sulfolactate degradation                           | 974.83±57.84ab     | 843.47±41.61bc    | 1077.13±65.79a     | 1039.12±90.26a     | 735.45±33.18c     |
| Cinnamate and 3-hydroxycinnamate degradation to 2-oxopent-4-enoate | 1038.81±137.04a    | 599.26±35.96bc    | 828.28±123.79ab    | 596.83±51.00bc     | 484.7±40.03c      |
| L-rhamnose degradation II                                          | 4.36±2.31ns        | 7.59±1.76ns       | 21.91±8.38ns       | 9.30±1.52ns        | 61.2±48.6ns       |

|                                                   |                    |                   |                    |                    |                    |
|---------------------------------------------------|--------------------|-------------------|--------------------|--------------------|--------------------|
| Starch degradation III                            | 663.75±26.01a      | 627.25±71.25ab    | 572.78±19.96ab     | 348.75±28.92c      | 484.37±79.67bc     |
| Starch degradation V                              | 33017.44±1568.7ns  | 34793.72±983.82ns | 30454.06±749.01ns  | 32667.85±2167.44ns | 31608.66±2259.46ns |
| Superpathway of glucose and xylose<br>degradation | 23679.75±1104.86ns | 24508.51±766.63ns | 24207.99±1518.58ns | 23672.07±1209.91ns | 24986.36±2725.64ns |
| Chitin derivatives degradation                    | 139.01±29.75ns     | 159.27±22.31ns    | 258.51±47.15ns     | 243.57±35.89ns     | 168.24±55.39ns     |
| Androstenedione degradation                       | 1771.16±40.08a     | 1452.96±21.64bc   | 1868.31±99.61a     | 1635.24±142.44ab   | 1334.27±91.15c     |
| Sitosterol degradation to androstenedione         | 838.75±160.61a     | 98.33±18.84b      | 207.6±30.83b       | 198.72±33.70b      | 171.01±42.57b      |
| Mandelate degradation to acetyl-coa               | 79.69±18.64ns      | 140.51±9.54ns     | 87.19±8.55ns       | 127.5±33.84ns      | 105.5±19.47ns      |
| 1,5-anhydrofructose degradation                   | 1017.82±113.90ab   | 902.11±35.88b     | 1221.81±139.13a    | 1195.86±90.78ab    | 951.86±39.26ab     |
| 4-hydroxyacetophenone degradation                 | 0.68±0.44b         | 3.21±0.80b        | 1.12±0.34b         | 12.21±2.35a        | 1.85±0.22b         |
| Glycerol degradation to butanol                   | 2141.45±203.82ns   | 2568.41±168.64ns  | 2430.21±236.11ns   | 2167.01±120.37ns   | 3253.91±811.82ns   |
| L-1,2-propanediol degradation                     | 2986.71±588.25a    | 411.7±62.56b      | 849.54±138.69b     | 970.39±169.75b     | 922.71±194.57b     |
| 4-coumarate degradation (anaerobic)               | 37.75±5.88ns       | 41.67±2.50ns      | 38.70±2.47ns       | 44.35±3.16ns       | 38.51±6.49ns       |

|                                                        |                    |                   |                   |                    |                   |
|--------------------------------------------------------|--------------------|-------------------|-------------------|--------------------|-------------------|
| Vanillin and vanillate degradation I                   | 1254.07±55.10a     | 940.63±14.51b     | 1095.77±40.94ab   | 1130.60±133.08ab   | 907.45±75.30b     |
| Vanillin and vanillate degradation II                  | 1360.78±56.79a     | 1028.35±15.33b    | 1191.45±45.21ab   | 1235.10±144.11ab   | 995.09±81.07b     |
| Superpathway of pyrimidine ribonucleosides degradation | 22.96±4.27ns       | 25.46±1.55ns      | 21.47±4.23ns      | 23.97±2.13ns       | 15.98±2.81ns      |
| Nicotinate degradation I                               | 183.33±8.64b       | 205.58±8.85ab     | 212.58±11.75ab    | 243.39±19.74a      | 222.51±26.04ab    |
| Myo-, chiro- and scillo-inositol degradation           | 3976.91±210.06c    | 4000.22±281.73c   | 5073.31±366.2ab   | 5667.53±406.94a    | 4678.58±217.36bc  |
| D-fructuronate degradation                             | 17448.91±1077.93ns | 15548.37±565.72ns | 15400.97±724.53ns | 14922.56±1007.98ns | 15814.95±903.62ns |
| L-arabinose degradation IV                             | 841.49±152.2ns     | 884.96±57.99ns    | 792.64±27.86ns    | 1022.24±71.25ns    | 932.39±26.27ns    |
| Aromatic biogenic amine degradation (bacteria)         | 15378.71±547.86a   | 13591.37±245.95b  | 13972.15±440.21ab | 13293.31±843.59b   | 12609.1±336.35b   |
| Mannan degradation                                     | 2075.23±298.3b     | 2641.23±182.12b   | 2290.02±178.65b   | 2611.28±287.19b    | 4869.52±586.94a   |
| Heparin degradation                                    | 149.55±33.24a      | 86.44±21.23ab     | 99.76±33.47ab     | 58.48±17.89b       | 99.36±27.81ab     |

|                                                                  |                   |                   |                   |                    |                    |
|------------------------------------------------------------------|-------------------|-------------------|-------------------|--------------------|--------------------|
| 3-phenylpropanoate and 3-(3-hydroxyphenyl)propanoate degradation | 2760.32±271.43a   | 1838.64±75.55bc   | 2349.19±244.27ab  | 1854.4±136.27bc    | 1515.69±102.69c    |
| Purine ribonucleosides degradation                               | 16151.46±790.92ns | 16412.08±336.39ns | 15737.61±667.71ns | 14979.45±895.95ns  | 16077.1±1684.63ns  |
| Superpathway of purine deoxyribonucleosides degradation          | 17283.69±956.74ns | 19148.78±947.98ns | 17576.27±351.73ns | 20139.88±1469.46ns | 18256.3±1483.11ns  |
| Superpathway of pyrimidine deoxyribonucleosides degradation      | 14677.38±753.98ns | 15547.58±646.39ns | 14370.17±341.35ns | 15714.77±1050.34ns | 15052.33±1302.93ns |
| Methylphosphonate degradation I                                  | 3623.74±261.92c   | 4200.87±129.95bc  | 4963±227.51a      | 4672.71±377.43ab   | 4008.6±98.43bc     |
| Phenylacetate degradation I (aerobic)                            | 5558.98±83.09a    | 4835.26±189.95ab  | 5264.52±298.51a   | 4110.2±223.88b     | 4281.85±317.15b    |
| Allantoin degradation IV (anaerobic)                             | 131.26±23.88ns    | 262.19±68.62ns    | 198.2±29.22ns     | 259.98±30.63ns     | 271.1±92.87ns      |
| L-rhamnose degradation I                                         | 6356.36±335.22ns  | 6262.8±219.34ns   | 6418.05±313.56ns  | 6479.81±409.48ns   | 6191.37±357.48ns   |
| Adenosine nucleotides degradation II                             | 41789.49±818.4a   | 40989.54±733.47a  | 39676.38±795.98ab | 38345.08±2521.85ab | 36176.46±1128.57b  |
| L-tyrosine degradation I                                         | 15619.97±595.97a  | 13624.28±537.4ab  | 14296.82±345.51a  | 11993.92±1028.75b  | 12113.84±591.59b   |

---

|                        |               |                |               |                |               |
|------------------------|---------------|----------------|---------------|----------------|---------------|
| L-valine degradation I | 392.8±35.83ab | 387.82±27.29ab | 458.11±56.47a | 350.08±23.37ab | 332.46±31.70b |
|------------------------|---------------|----------------|---------------|----------------|---------------|

---

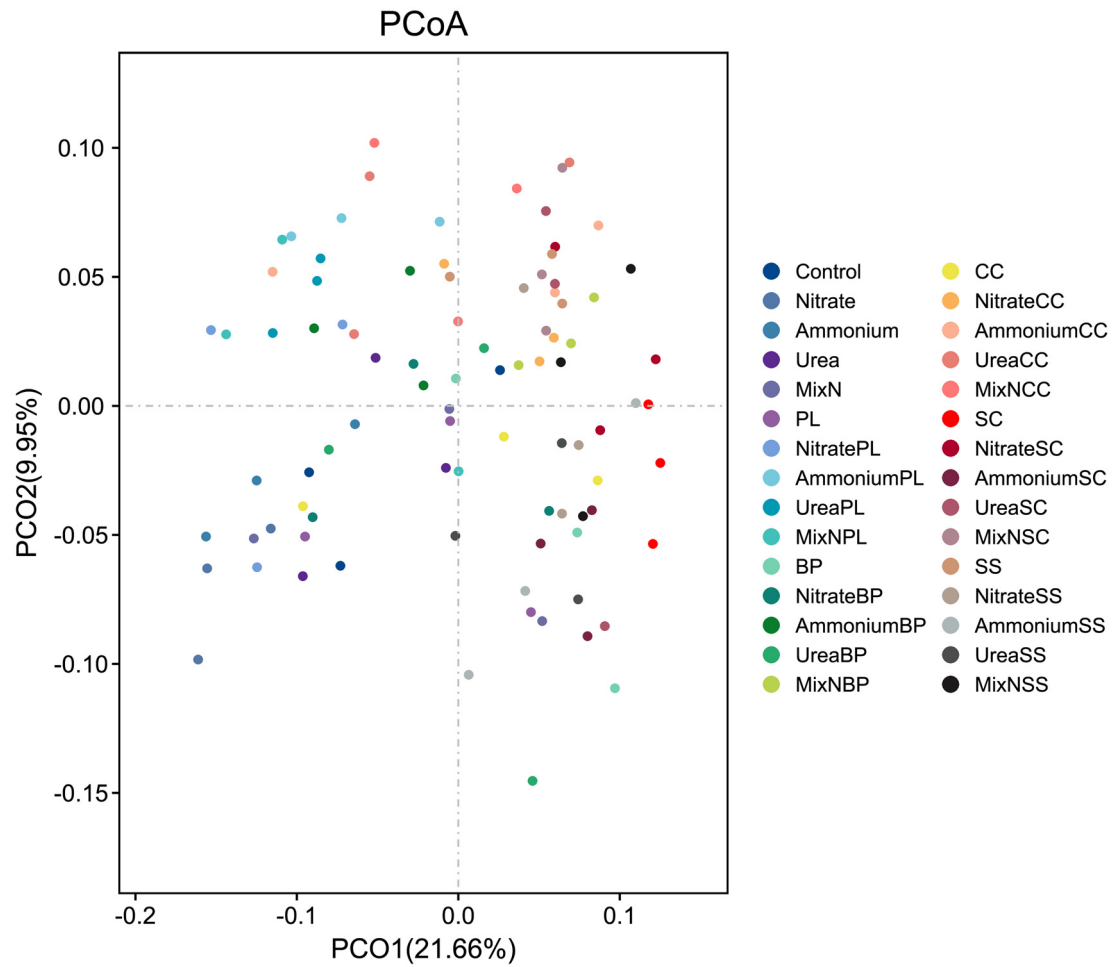

**Figure S1** PCoA of beta diversity estimates of soil bacterial communities treated with the leaves of the four invasive plants and *P. laciniata* under nitrogen with four forms based on weighted UniFrac distance. Abbreviations: PL, *Pterocypsela laciniata* (Houtt.) Shih; BP, *Bidens pilosa* L.; CC, *Conyza canadensis* (L.) Cronq.; SC, *Solidago canadensis* L.; SS, *Symphyotrichum subulatum* (Michx.) G.L. Nesom; CK, control; MixN, the mixed nitrogen forms.

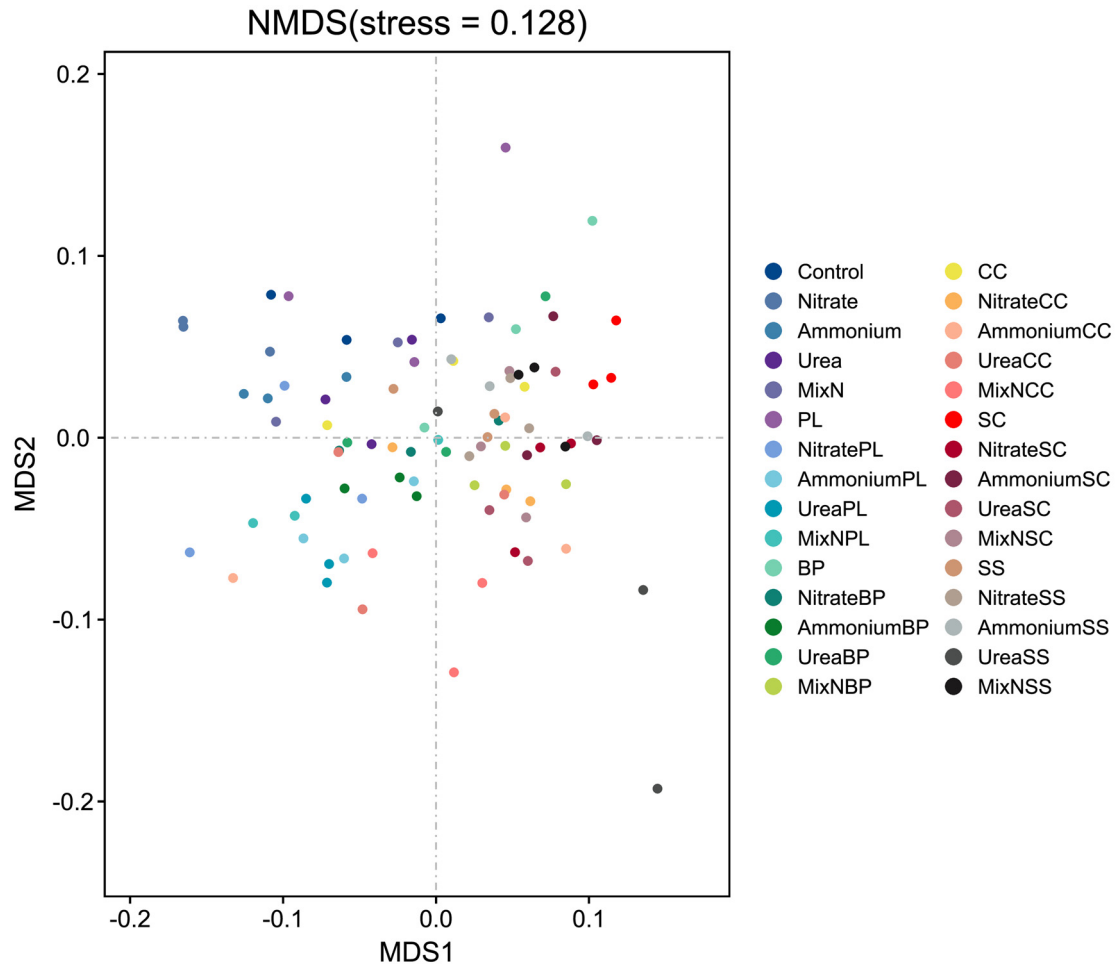

**Figure S2** NMDS of beta diversity estimates of soil bacterial communities treated with the leaves of the four invasive plants and *P. laciniata* under nitrogen with four forms based on weighted UniFrac distance. Abbreviations have the same meanings as defined in Figure S1.

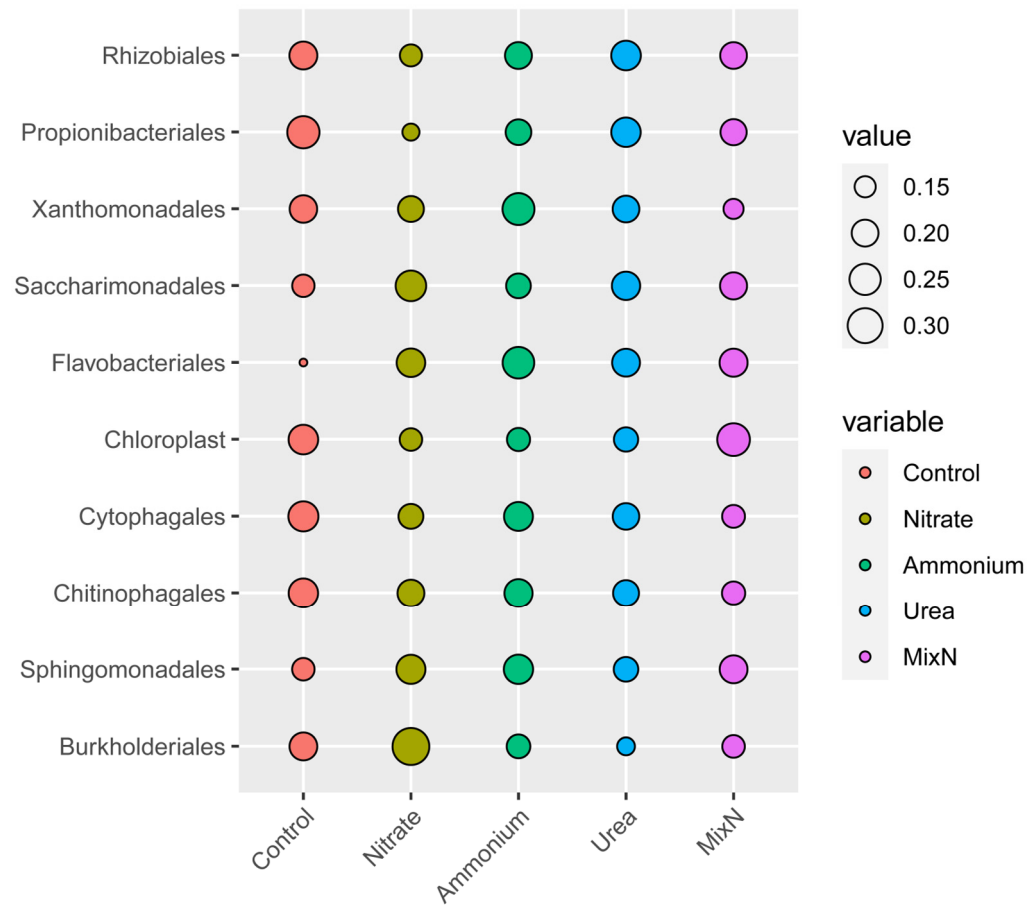

**Figure S3** Bubble chart of soil bacterial biomarkers at the order level under nitrogen with four forms. Abbreviations have the same meanings as defined in Figure S1.



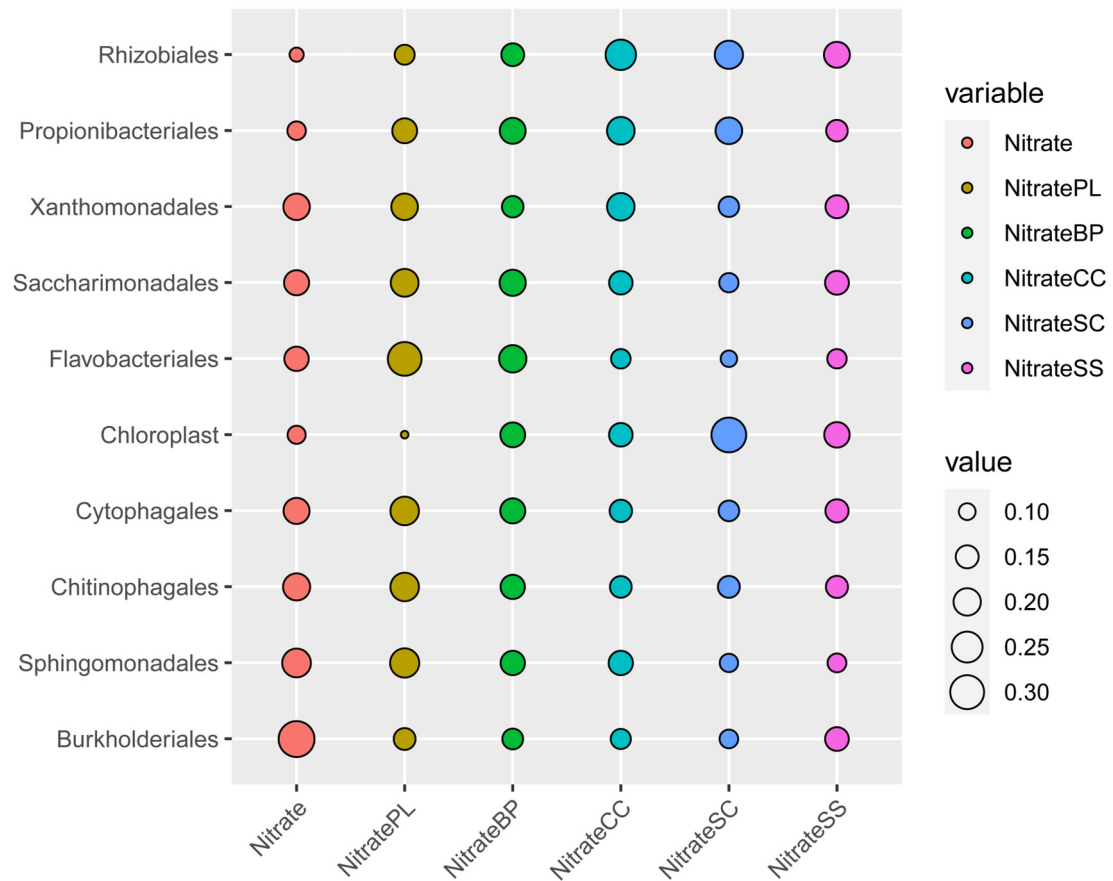

**Figure S4** Bubble chart of soil bacterial biomarkers at the order level treated with the leaves of the four invasive plants and *P. laciniata* under nitrate. Abbreviations have the same meanings as defined in Figure S1.

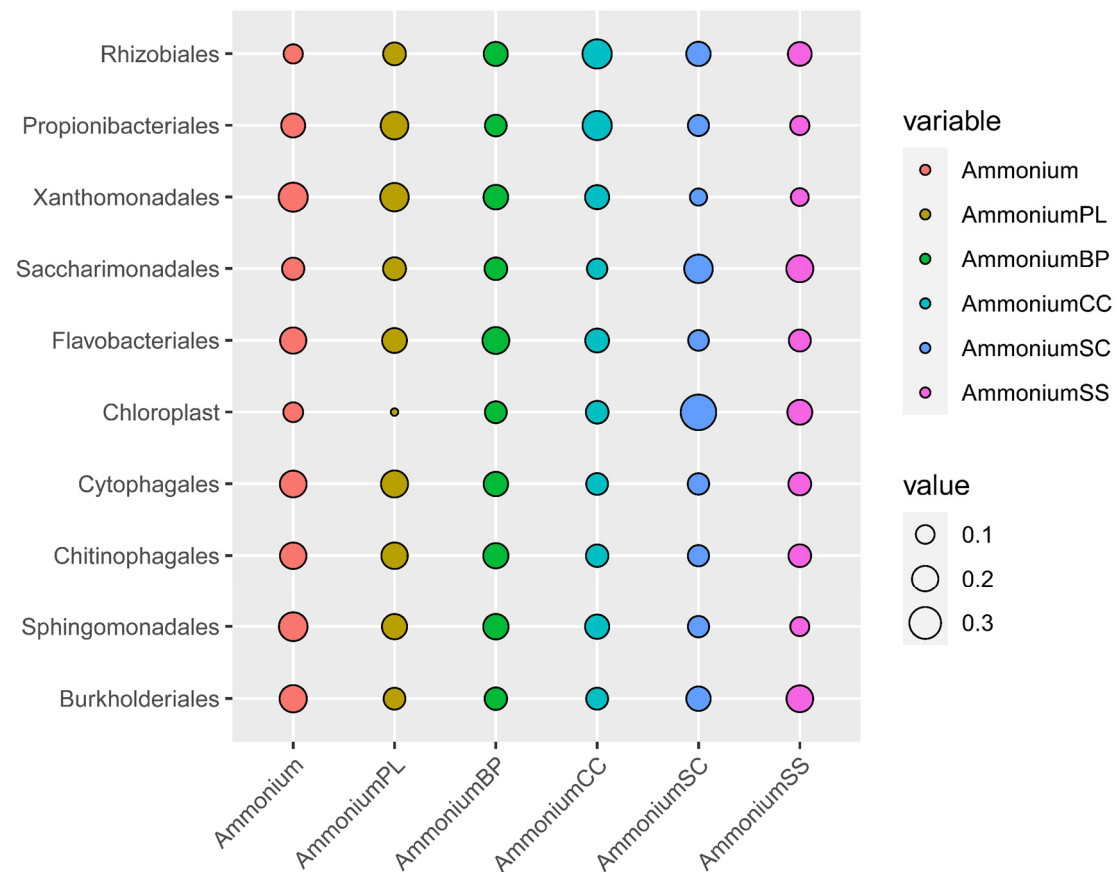

**Figure S5** Bubble chart of soil bacterial biomarkers at the order level treated with the leaves of the four invasive plants and *P. laciniata* under ammonium. Abbreviations have the same meanings as defined in Figure S1.

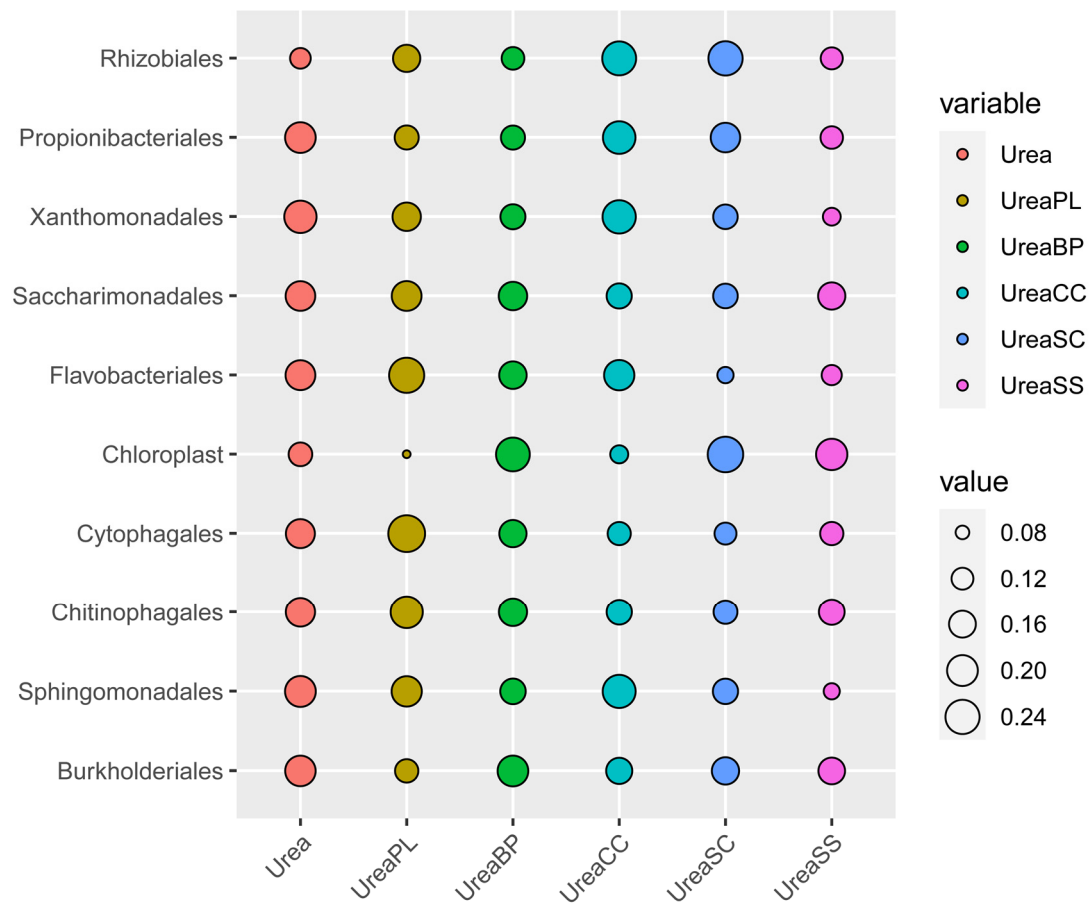

**Figure S6** Bubble chart of soil bacterial biomarkers at the order level treated with the leaves of the four invasive plants and *P. laciniata* under urea. Abbreviations have the same meanings as defined in Figure S1.

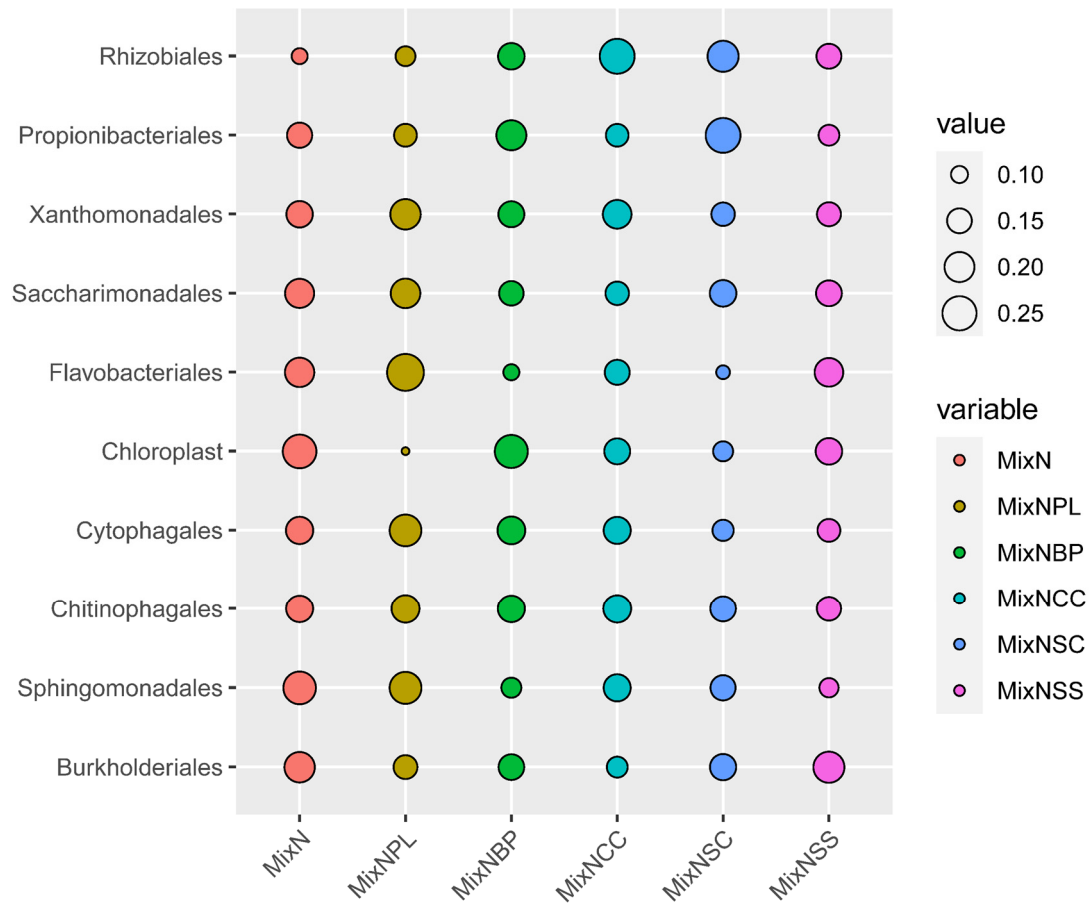

**Figure S7** Bubble chart of soil bacterial biomarkers at the order level treated with the leaves of the four invasive plants and *P. laciniata* under the mixed nitrogen forms. Abbreviations have the same meanings as defined in Figure S1.
